# Supplementary material for: Colorimetric strips for visual lead ion recognition utilizing polydiacetylene embedded nanofibers
Source: Royal Society of Chemistry journal article supplement (doi:10.1039/c4ta04547e), 2014-01-01
Supplement: c4ta04547e1.pdf [file c4ta04547e1.pdf]

## **Colorimetric Strips for Visual Lead Ion Recognition Utilizing Polydiacetylenes Embedded Nanofibers**

*Yan Li<sup>a</sup>, Lihuan Wang<sup>a</sup>, Xia Yin<sup>a</sup>, Bin Ding<sup>a, b\*</sup>, Gang Sun<sup>b</sup>, Tao Ke<sup>c</sup>,  
Jingyuan Chen<sup>c\*</sup>, and Jianyong Yu<sup>a</sup>*

<sup>a</sup> Key Laboratory of Textile Science & Technology, Ministry of Education, College of Textiles, Donghua University, Shanghai 201620, China

<sup>b</sup> Nanomaterials Research Center, Modern Textile Institute, Donghua University, Shanghai 200051, China

<sup>c</sup> Department of Occupational and Environmental Health, School of Public Health, Fourth Military Medical University, Xi'an, Shanxi 710032, China

\* Corresponding author at: Key Laboratory of Textile Science & Technology, Ministry of Education, College of Textiles, Donghua University, Shanghai 201620, China.

Fax: +86 21 62378392.

*E-mail:* binding@dhu.edu.cn (B. Ding) and jy\_chen@fmmu.edu.cn (J. Chen)

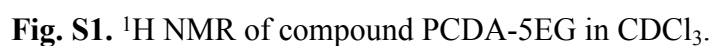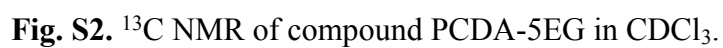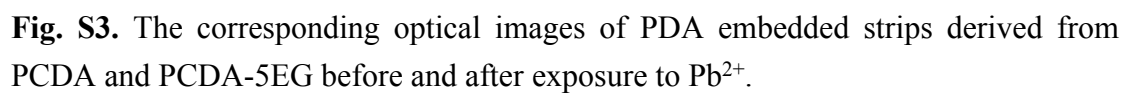

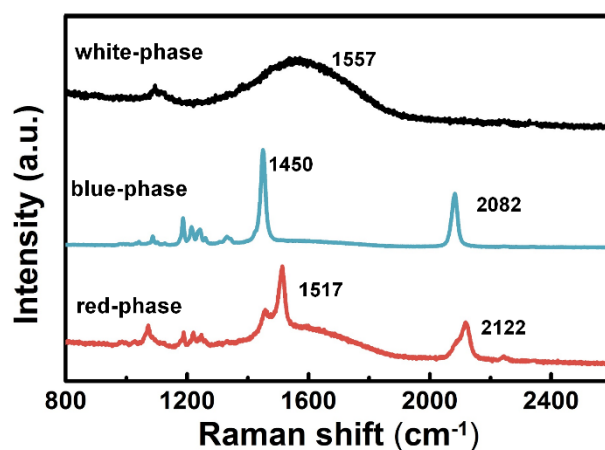

**Fig. S4.** Raman spectra of PDA-1/PAN-6 strip before UV polymerization (white-phase), after UV polymerization (blue-phase), and after incubation with 4  $\mu\text{M}$   $\text{Pb}^{2+}$  (red-phase).

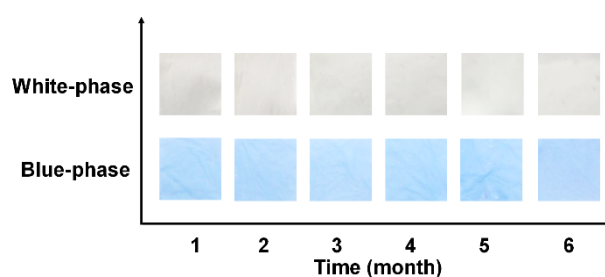

**Fig. S5.** Optical images showing the stability of white and blue-phase nanofibers within 6 months.

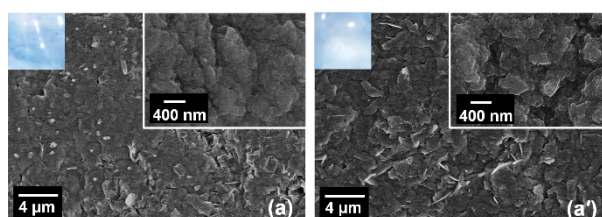

**Fig. S6.** FE-SEM images of casting film based strip before (a) and after (a') incubated with 4  $\mu\text{M}$   $\text{Pb}^{2+}$ . Insets show the corresponding optical images.
